# Supplementary material for: Electrochemical properties of a titanium-substituted KVPO4F cathode for K-ion batteries
Source: Royal Society of Chemistry journal article supplement (doi:10.1039/d3ta01310c), 2023-01-01
Supplement: d3ta01310c1.pdf [file d3ta01310c1.pdf]

## Electronic Supplementary Information (ESI)

### **Electrochemical Properties of a Titanium-Substituted KVPO<sub>4</sub>F Cathode for K-Ion Batteries**

Xiaoran Yang,<sup>a</sup> Danna Yan,<sup>a</sup> Tsengming Chou,<sup>a</sup> and Jae Chul Kim<sup>a,\*</sup>

<sup>a</sup>*Department of Chemical Engineering and Materials Science, Stevens Institute of Technology, Hoboken, NJ,  
07030, USA*

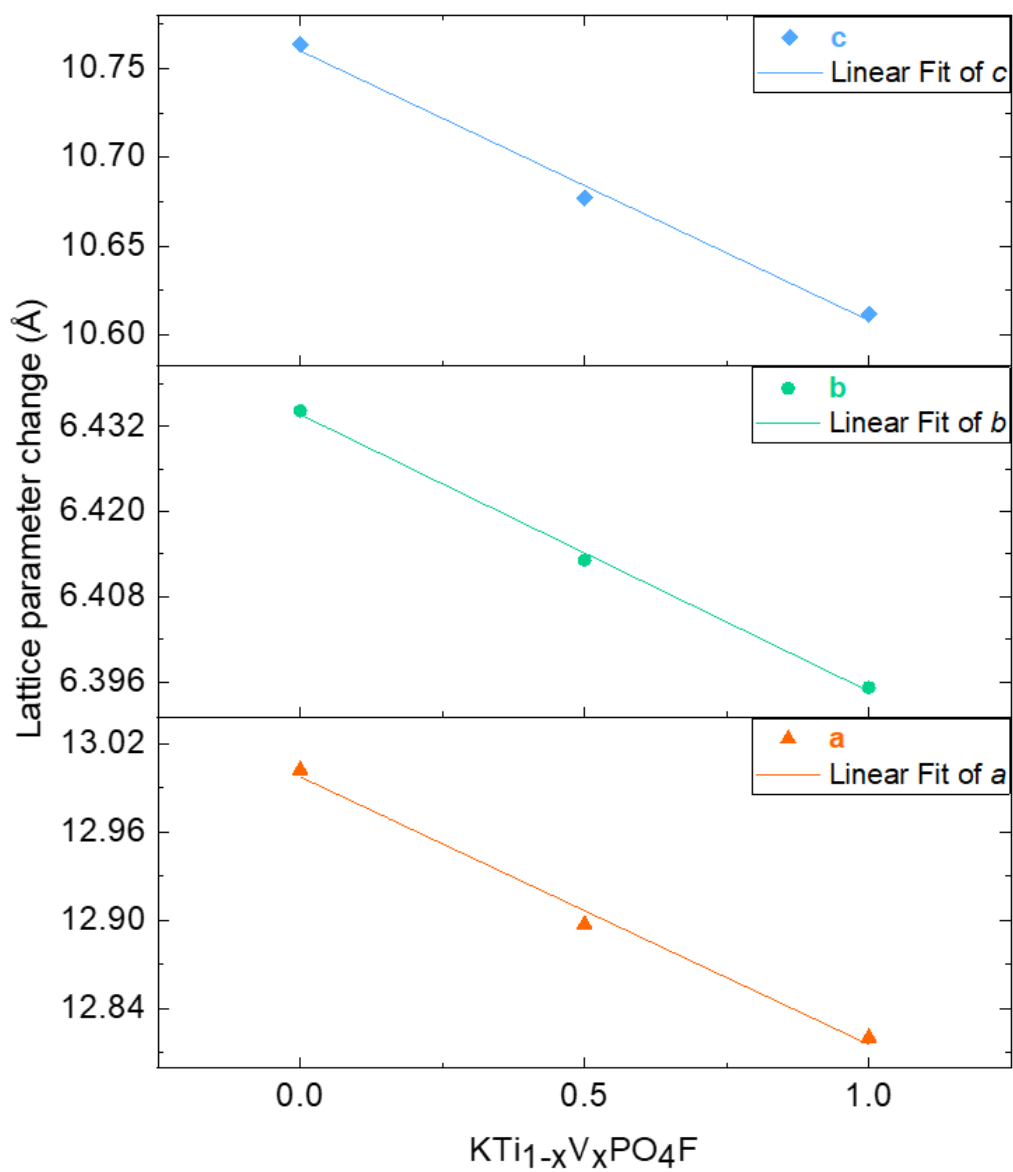

**Figure S1.** Lattice parameters of  $\text{KTi}_{1-x}\text{V}_x\text{PO}_4\text{F}$  obtained by Rietveld refinement.

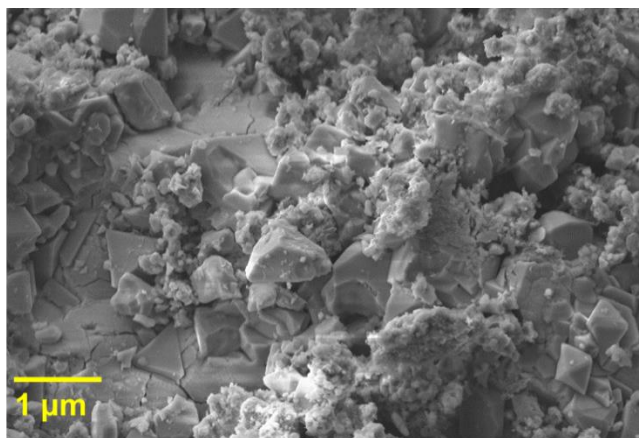

**Figure S2.** SEM image of as-synthesized KV<sub>0.5</sub>Ti<sub>0.5</sub>PO<sub>4</sub>F

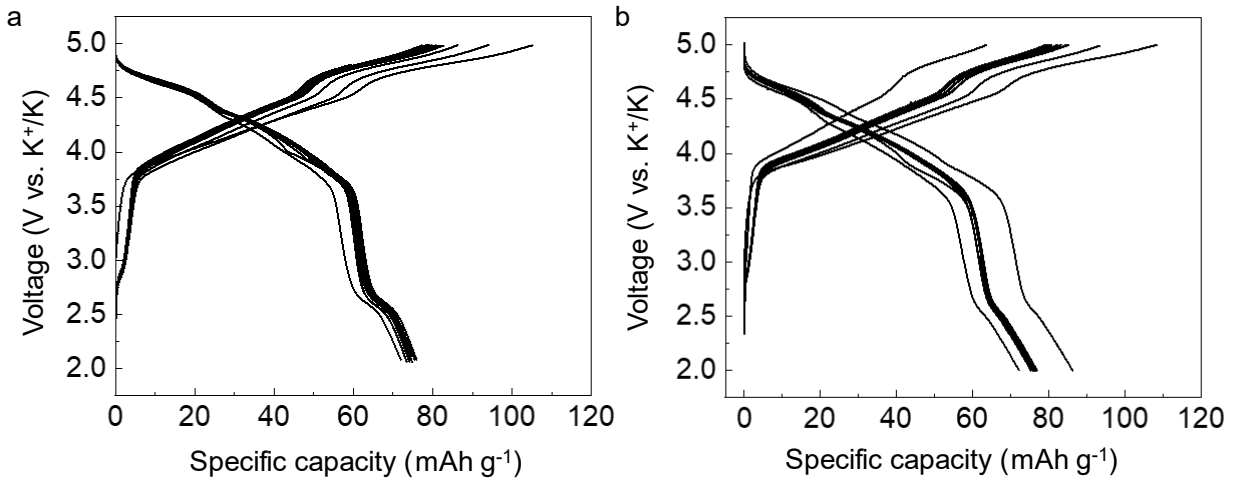

**Figure S3.** Voltage vs. capacity curves for (a) micron-sized (pristine) and (b) nano-sized (ball-milled)  $KV_{0.5}Ti_{0.5}PO_4F$  at C/10 for 10 cycles

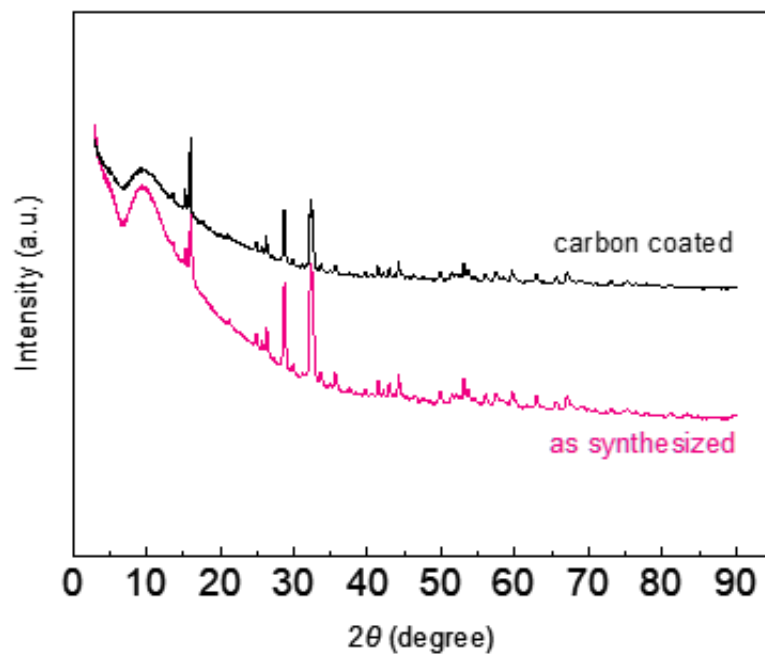

**Figure S4.** XRD patterns of KV<sub>0.5</sub>Ti<sub>0.5</sub>PO<sub>4</sub>F before and after carbon coating

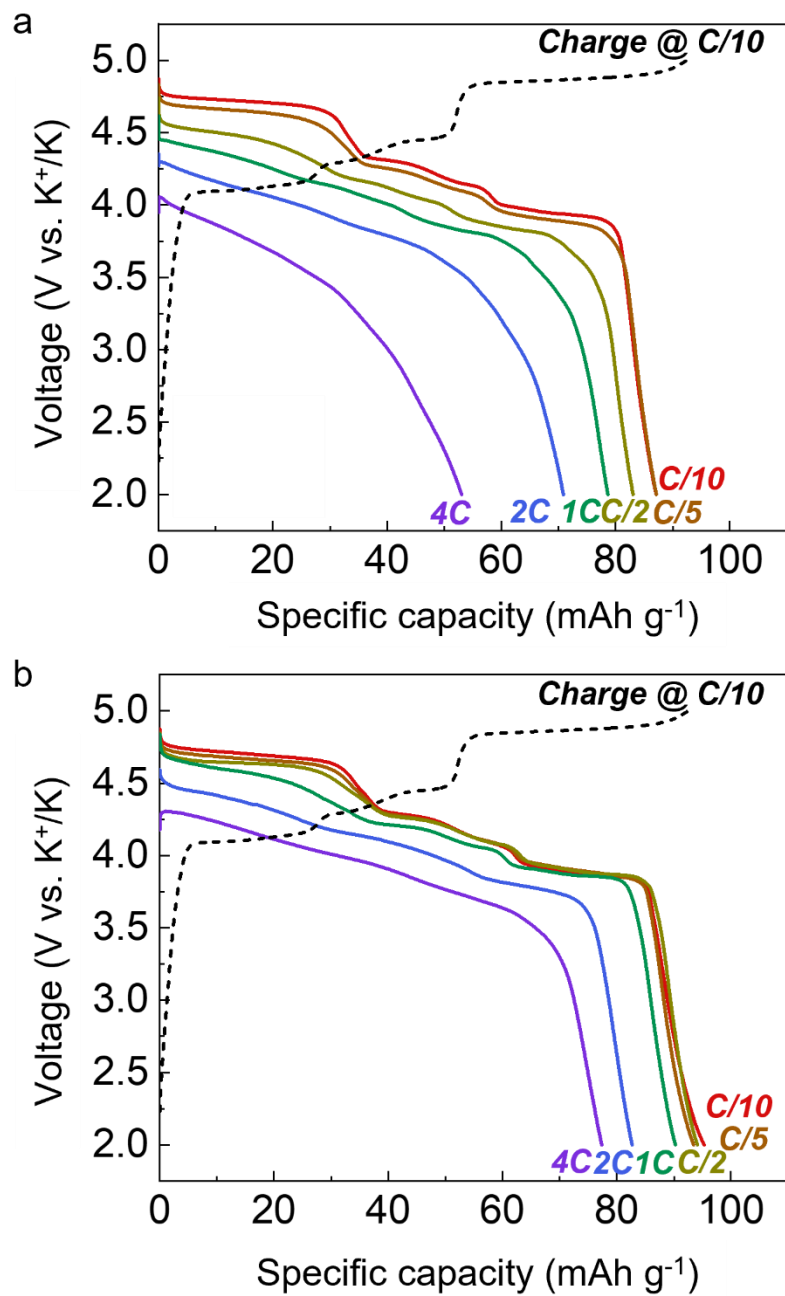

**Figure S5.** Discharge rate capability of KVPO<sub>4</sub>F/C at (a) 25°C and (b) 35°C. The cells were charged at C/10 after each discharge.

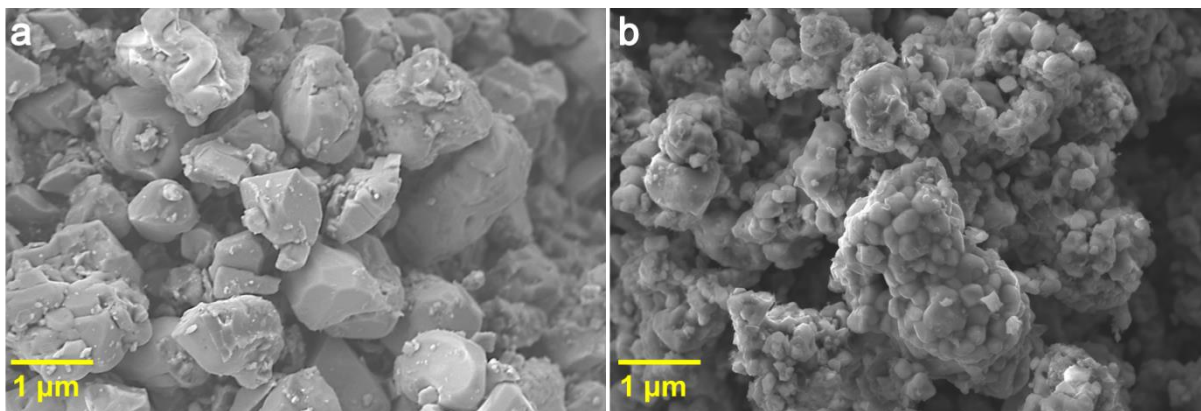

**Figure S6.** SEM images of (a) as-synthesized and (b) carbon-coated KVPO<sub>4</sub>F

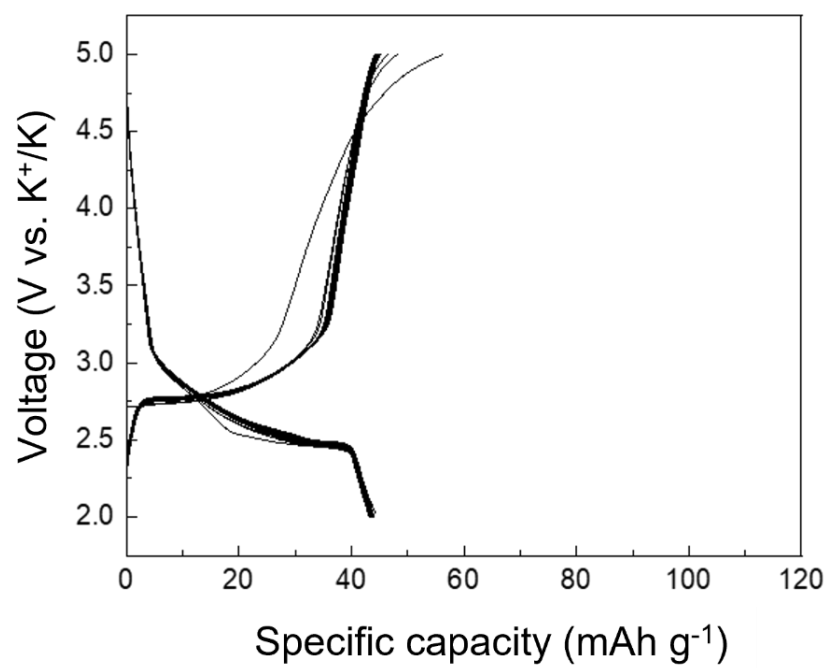

**Figure S7.** Voltage profile (10 cycles) of KTiPO<sub>4</sub>F/C at C/10



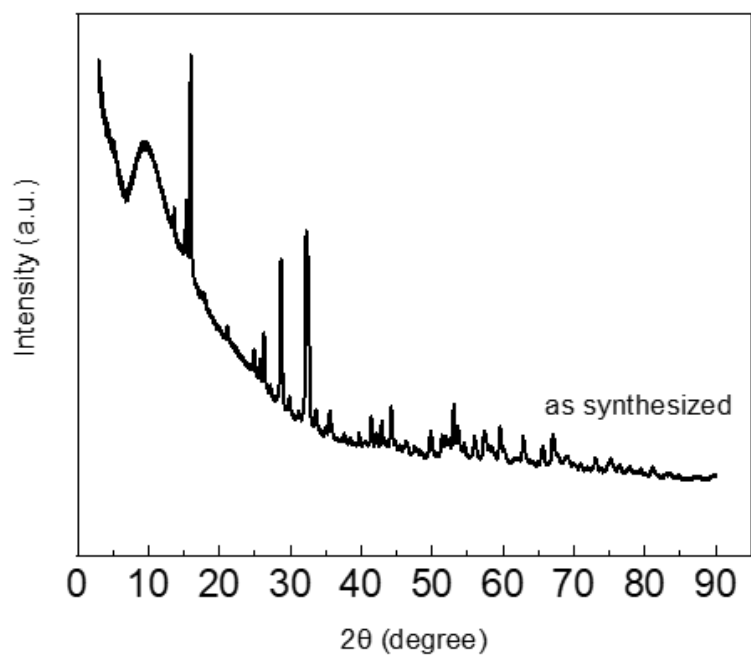

**Figure S8.** XRD pattern of as-synthesized KTiPO<sub>4</sub>F

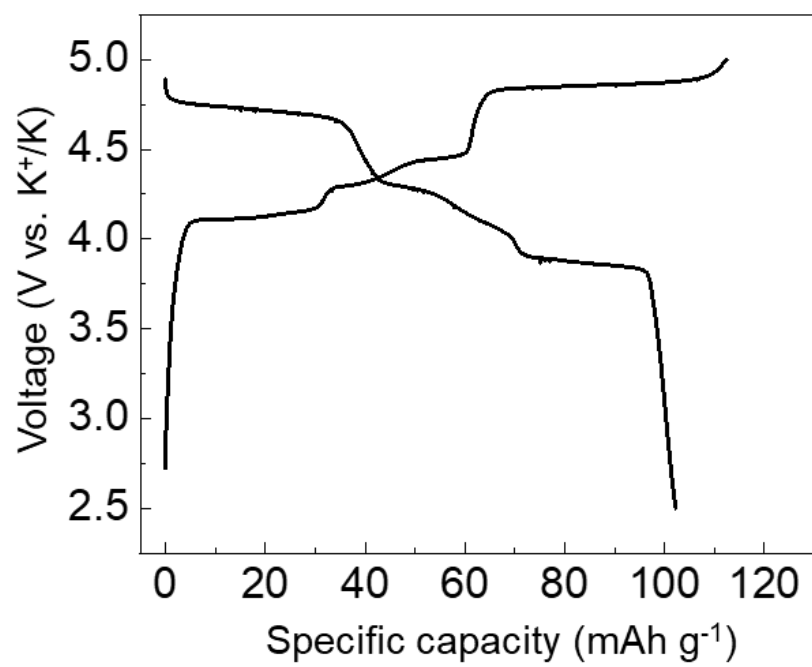

**Figure S9.** Voltage vs. capacity of KVPO<sub>4</sub>F/C at C/10 (the second cycle)

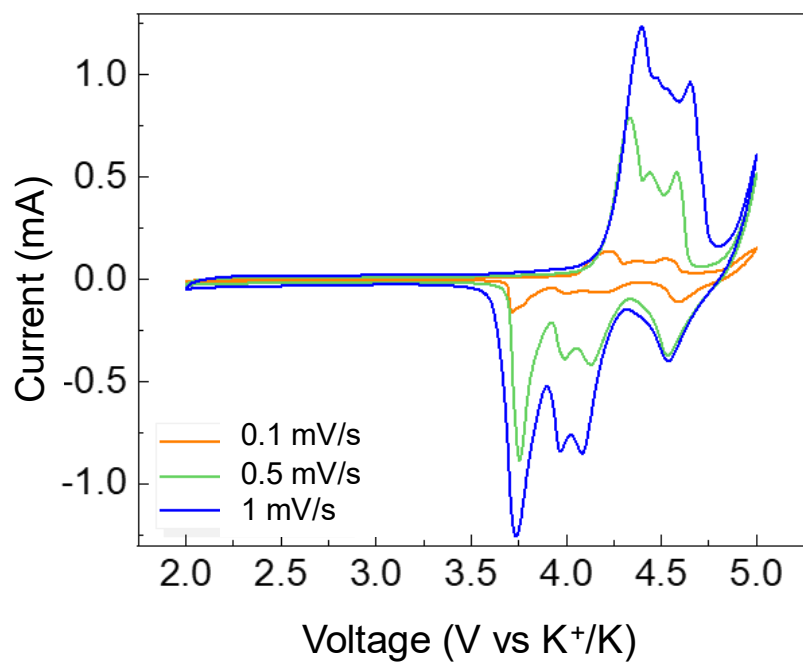

**Figure S10.** CV of KVPO<sub>4</sub>F/C at different scan rates

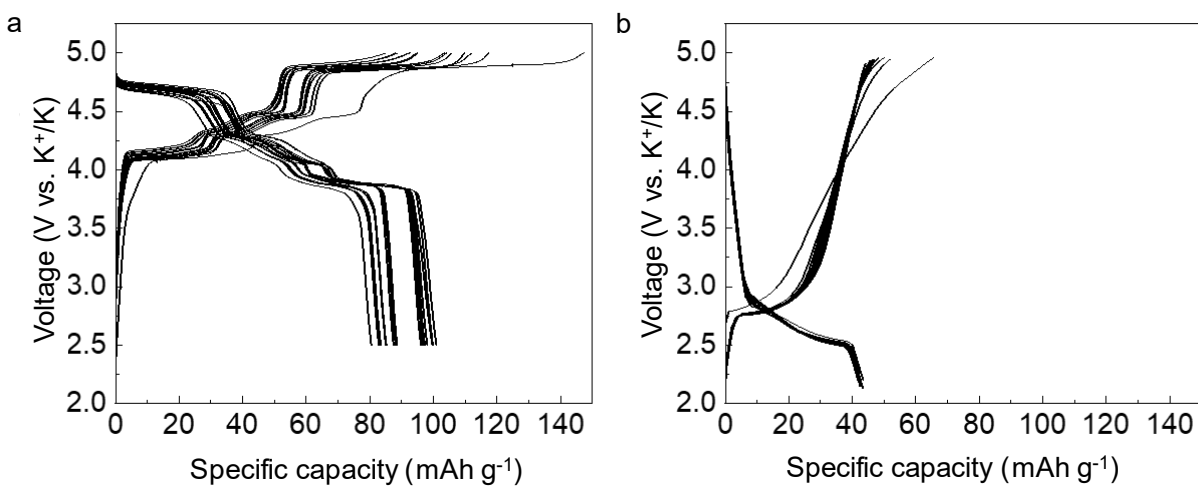

**Figure S11.** The voltage vs. capacity curves of (a) KVPO<sub>4</sub>F and (b) KTiPO<sub>4</sub>F at C/10 for 30 cycles.

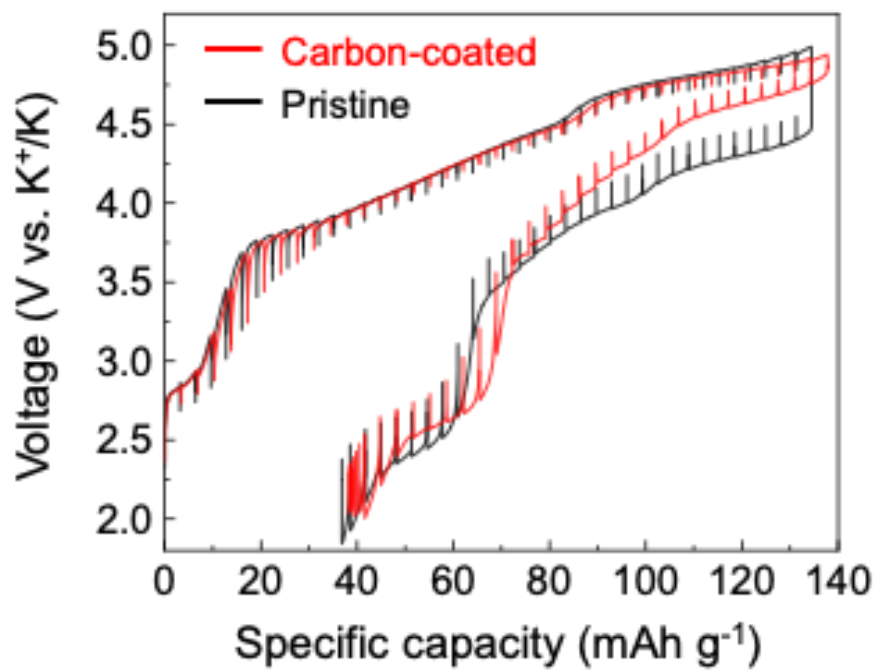

**Figure S12.** Calculated chemical diffusion coefficients of  $\text{KTi}_{0.5}\text{V}_{0.5}\text{PO}_4\text{F}/\text{C}$  and  $\text{KTi}_{0.5}\text{V}_{0.5}\text{PO}_4\text{F}$  upon (a) charge and (d) discharge.

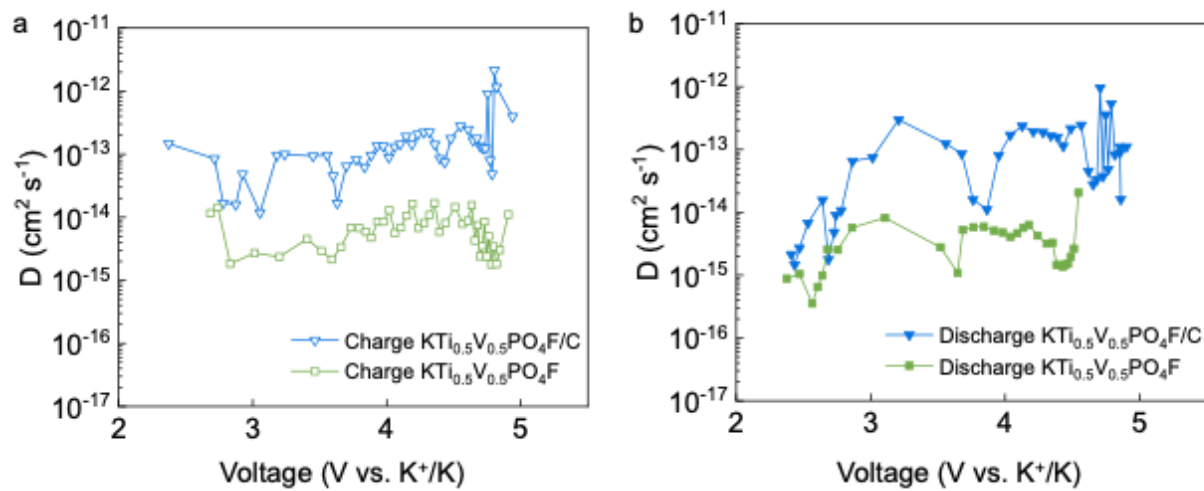

**Figure S13.** Calculated chemical diffusion coefficients of  $\text{KTi}_{0.5}\text{V}_{0.5}\text{PO}_4\text{F}/\text{C}$  and  $\text{KTi}_{0.5}\text{V}_{0.5}\text{PO}_4\text{F}$  upon (a) charge and (d) discharge.

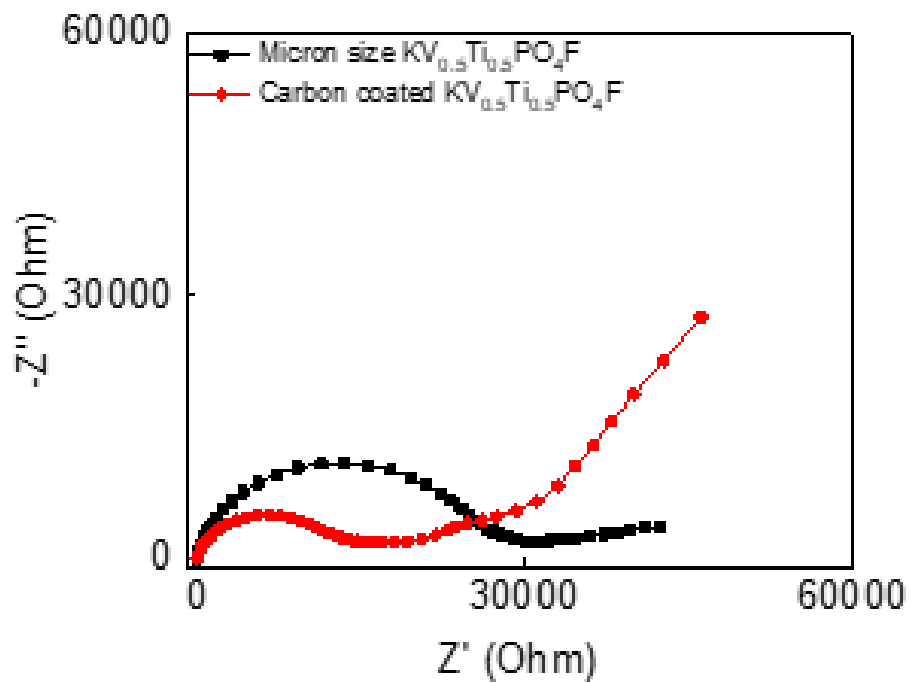

**Figure S14.** Nyquist plots for two K metal half cells with the carbon-coated and pristine  $KTi_{0.5}V_{0.5}PO_4F$  cathodes (after one C/5 cycle).

**Table S1.** Crystallographic data obtained from Rietveld refinement for  $\text{KTi}_{0.5}\text{V}_{0.5}\text{PO}_4\text{F}$ .

|                                                 |                                                                           |
|-------------------------------------------------|---------------------------------------------------------------------------|
| <b>Formula</b>                                  | $\text{KTi}_{0.5}\text{V}_{0.5}\text{PO}_4\text{F}$                       |
| <b>Space group</b>                              | $Pna2_1$                                                                  |
| <b>a, Å</b>                                     | 12.8911                                                                   |
| <b>b, Å</b>                                     | 6.411                                                                     |
| <b>c, Å</b>                                     | 10.665                                                                    |
| <b>V, Å<sup>3</sup></b>                         | 881.4067                                                                  |
| <b>Radiation</b>                                | X-rays, Cu-K $\alpha$ , $\lambda_1 = 1.540598$ Å, $\lambda_2 = 1.54433$ Å |
| <b>Two theta range, step, deg.</b>              | 10–75, 0.01                                                               |
| <b><math>R_E</math>, %</b>                      | 0.71987                                                                   |
| <b><math>R_p</math>, <math>R_{wp}</math>, %</b> | 8.02992, 12.55658                                                         |

| Atom | Wyckoff position | Atomic position |         |         | Occupancy |
|------|------------------|-----------------|---------|---------|-----------|
|      |                  | x               | y       | z       |           |
| K0   | 4a               | 0.10325         | 0.70147 | 0.06001 | 1         |
| K1   | 4a               | 0.12164         | 0.27556 | 0.80093 | 1         |
| V2   | 4a               | 0.11553         | 0.99470 | 0.50315 | 0.5       |
| V3   | 4a               | 0.24666         | 0.24953 | 0.25214 | 0.5       |
| Ti2  | 4a               | 0.11553         | 0.99470 | 0.50315 | 0.5       |
| Ti3  | 4a               | 0.24666         | 0.24953 | 0.25214 | 0.5       |
| P4   | 4a               | 0.00124         | 0.83393 | 0.75416 | 1         |
| P5   | 4a               | 0.18045         | 0.49762 | 0.50419 | 1         |
| O6   | 4a               | 0.01019         | 0.02722 | 0.37057 | 1         |
| O7   | 4a               | 0.01634         | 0.98539 | 0.64401 | 1         |
| O8   | 4a               | 0.09415         | 0.30214 | 0.23167 | 1         |
| O9   | 4a               | 0.09759         | 0.69671 | 0.77284 | 1         |
| O10  | 4a               | 0.11115         | 0.30836 | 0.53029 | 1         |
| O11  | 4a               | 0.11218         | 0.68635 | 0.47816 | 1         |
| O12  | 4a               | 0.24673         | 0.95382 | 0.89279 | 1         |
| O13  | 4a               | 0.24907         | 0.03340 | 0.11931 | 1         |
| F14  | 4a               | 0.23030         | 0.98003 | 0.62994 | 1         |
| F15  | 4a               | 0.23099         | 0.02362 | 0.38101 | 1         |

Note that the reference structure for Rietveld refinement was obtained from computation that assumes equal population of K over the two K sites and equal population of transition metals over the two transition metal sites per formula unit. The difference between observed and calculated peak intensities in Figure 1 in the manuscript implies that K, Ti, and V in synthesized  $\text{KTi}_{0.5}\text{V}_{0.5}\text{PO}_4\text{F}$  may have different site occupancies from the reference structure.
